# Supplementary material
Source: publisher figshare collection journal article supplement (https://sage.figshare.com/ndownloader/files/25430058)
Supplement: Supplementary file 1 [file 25430058]

**Symptom scores in patients with radial artery thrombosis after coronary angiography**

**These sections will be evaluated and scored by the patient**

**1- How much pain do you have?**

❖ I do not have pain (0 point)

❖ I have little pain (1 point)

❖ I have moderate pain (2 points)

❖ I have severe pain (3 points)

**2- How much burning do you have?**

❖ I do not have burning (0 point)

❖ I have less burning (1 point)

❖ I have moderate burning (2 points)

❖ I have severe burning (3 points)

**3- How much numbness do you have?**

❖ I do not have numbness (0 points)

❖ I have less numbness (1 point)

❖ I have moderate numbness (2 points)

❖ I have severe numbness (3 points)

**This section will be evaluated and rated by the physician**

❖ No motor power loss (0 point)

❖ Low degree of motor power loss (1 point)

❖ Moderate motor power loss (2 points)

❖ Extreme loss of motor power (3 points)

**Total: ………points**
